# Supplementary material
Source: Royal Society of Chemistry journal article supplement (doi:10.1039/d5lc01048a)
Supplement: d5lc01048a6.pdf [file d5lc01048a6.pdf]

Video 1: Bacteria undergo a - 0.2 mM/mm MeAsp gradient, and we focus at  $z = 0$ , in contact with agar.

Video 2: Bacteria undergo no gradient, and we focus at  $z = h / 2$ , in bulk.

Video 3: Bacteria undergo a - 0.2 mM/mm MeAsp gradient, and we focus at  $z = h / 2$ , in bulk.
